# Supplementary material for: Phase transition of SiC support induces dispersed Na 2 WO 4 catalysts for CH 3 Cl-to-C 2 H 3 Cl conversion
Source: Royal Society of Chemistry journal article supplement (doi:10.1039/d5nr03574k), 2025-12-09
Supplement: d5nr03574k1.pdf [file d5nr03574k1.pdf]

## Supplementary material for

### Phase transition of SiC support induces dispersed Na<sub>2</sub>WO<sub>4</sub> catalyst for CH<sub>3</sub>Cl-to-C<sub>2</sub>H<sub>3</sub>Cl conversion

Xutao Chen<sup>a†</sup>, Yue Wang<sup>a†</sup>, Kunkun Wei<sup>a†</sup>, Yunxin Bao, Jifeng Ouyang<sup>a</sup>, Chengyuan Liu<sup>c</sup>, Yang Pan<sup>c</sup>, Shihui Zou<sup>b,\*</sup>, and Jie Fan<sup>a,\*</sup>

<sup>a</sup>Zhejiang Key Laboratory of Low-Carbon Synthesis of Value-Added Chemicals, Department of Chemistry, Zhejiang University, 310027 Hangzhou, China

<sup>b</sup>College of Materials Science and Engineering, Zhejiang University of Technology, Hangzhou 310014, China.

<sup>c</sup>National Synchrotron Radiation Laboratory, University of Science and Technology of China, Hefei 230029, China.

†These authors contributed equally to this work.

\*To whom correspondence should be addressed:

Fan Jie, E-mail: jfan@zju.edu.cn.

Zou Shihui, E-mail: zou@zjut.edu.cn

### Equations:

#### Selective coupling of methyl chloride to vinyl chloride (MCTV)

The CH<sub>3</sub>Cl conversion, products selectivity and yield were calculated using the following equations:

$$CH_3Cl \text{ Conv.} = \frac{|CH_3Cl_{inlet}| - |CH_3Cl_{outlet}|}{|CH_3Cl_{inlet}|} \times 100\% \#(1)$$

$$C_2H_3Cl \text{ Sel.} = \frac{2 \times |C_2H_3Cl|}{|CH_3Cl_{inlet}| - |CH_3Cl_{outlet}|} \times 100\% \#(2)$$

$$C_2H_3Cl \text{ Yield} = CH_3Cl \text{ Conv.} * C_2H_3Cl \text{ Sel.} * 100\% \#(3)$$

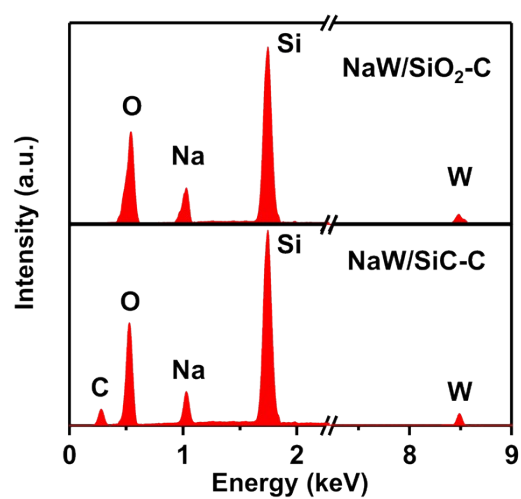

Figure S1. Elemental analysis of NaW/SiO<sub>2</sub>-C and NaW/SiC-C by EDS.

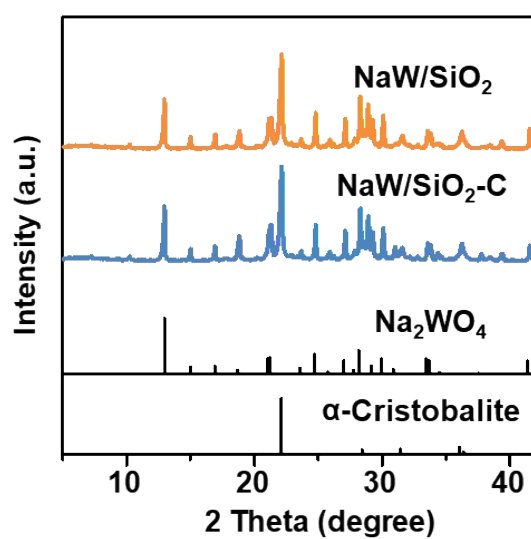

Figure S2. XRD pattern for catalyst before (NaW/SiO<sub>2</sub>) and after calcination (NaW/SiO<sub>2</sub>-C) using α-cristobalite as support.

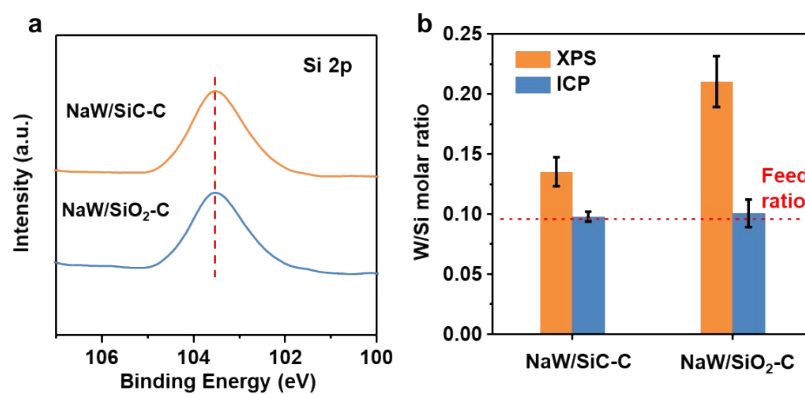

Figure S3. a) Si 2p of NaW/SiC-C and NaW/SiO<sub>2</sub>-C catalysts. b) Quantitative determination of the surface W/Si atomic ratios in NaW/SiC-C and NaW/SiO<sub>2</sub>-C catalysts by XPS and ICP-MS.

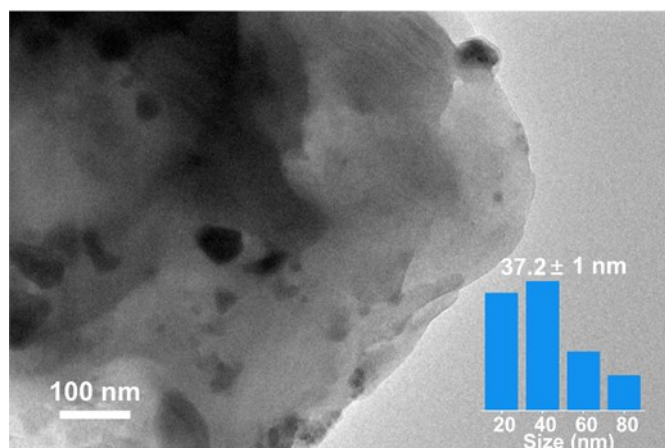

Figure S4. HRTEM image and particle size statistics of NaW/SiO<sub>2</sub>-C catalyst.

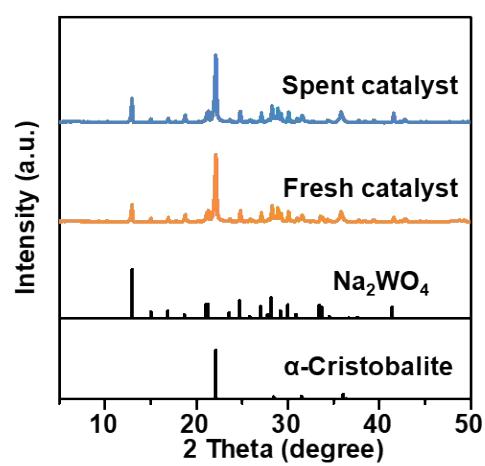

Figure S5. XRD pattern of fresh and spent NaW-SiC-C catalyst for long-term stability test.

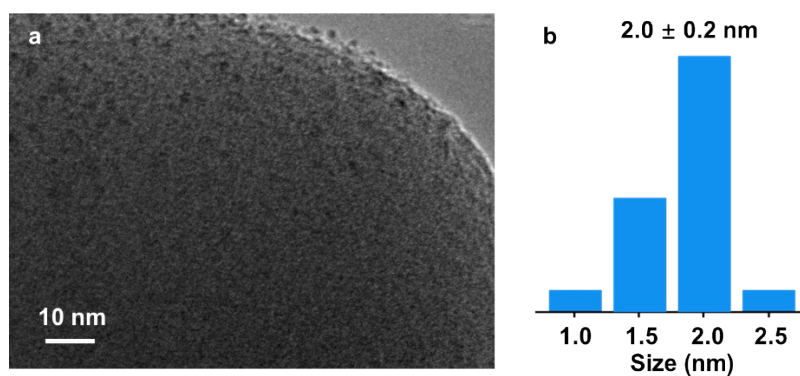

Figure S6. a) HRTEM image of spent NaW/SiC-C catalyst after long-term stability test.

b) Particle size distribution of  $\text{Na}_2\text{WO}_4$  species on spent NaW/SiC-C catalyst.



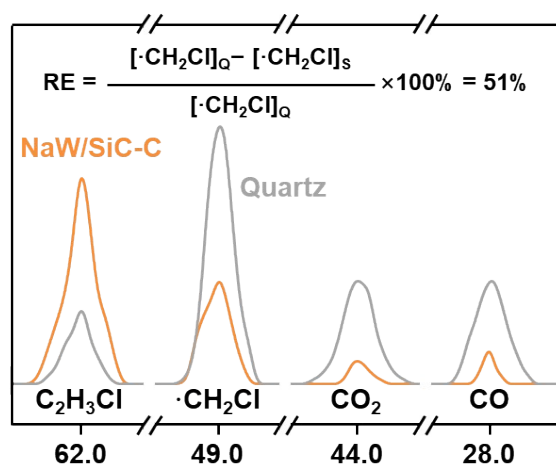

Figure S7.  $\text{C}_2\text{H}_3\text{Cl}$ ,  $\text{CH}_2\text{Cl}$ ,  $\text{CO}_2$  and  $\text{CO}$  signals detected by in-situ SVUV-PIMS of NaW/SiC-C and quartz, respectively.

**Table S1.** Elemental composition of NaW/SiO<sub>2</sub>-C and NaW/SiC-C by EDS.

| Catalysts               | Atomic ratio (%) |      |       |       |      |
|-------------------------|------------------|------|-------|-------|------|
|                         | C                | Na   | O     | Si    | W    |
| NaW/SiO <sub>2</sub> -C | 0.00             | 5.88 | 64.63 | 26.59 | 2.90 |
| NaW/SiC-C               | 0.64             | 5.79 | 63.90 | 26.80 | 2.87 |

Note: Based on the elemental ratios determined by EDS, the mass fraction of the remaining SiC in NaW/SiC-C is calculated to be ~1 wt%. This result indicates that only a small fraction of the  $\beta$ -SiC support retained its original phase after high-temperature treatment.

Table S2. The signal intensity of  $\cdot\text{CH}_2\text{Cl}$ ,  $\text{C}_2\text{H}_3\text{Cl}$ ,  $\text{CO}_2$  and  $\text{CO}$  of the catalysts detected by in-situ SVUV-PIMS and the calculated reaction efficiency (RE) value of  $\cdot\text{CH}_2\text{Cl}$ .

| Catalysts               | Signal intensity (arb. Units) |                                 |               |             | RE (%) |
|-------------------------|-------------------------------|---------------------------------|---------------|-------------|--------|
|                         | $\cdot\text{CH}_2\text{Cl}$   | $\text{C}_2\text{H}_3\text{Cl}$ | $\text{CO}_2$ | $\text{CO}$ |        |
| Quartz                  | 0.614                         | 0.091                           | 0.116         | 0.059       | -      |
| NaW/SiO <sub>2</sub> -C | 0.356                         | 0.291                           | 0.096         | 0.064       | 40     |
| NaW/SiC-C               | 0.306                         | 0.380                           | 0.033         | 0.015       | 51     |
